# 1 **Paleolithic DNA from the Caucasus reveals** 2 **core of West Eurasian ancestry**

3

4 Iosif Lazaridis<sup>1,2</sup>, Anna Belfer-Cohen<sup>3</sup>, Swapan Mallick<sup>1</sup>, Nick Patterson<sup>2</sup>, Olivia  
5 Cheronet<sup>4,5,6</sup>, Nadin Rohland<sup>1</sup>, Guy Bar-Oz<sup>7</sup>, Ofer Bar-Yosef<sup>8</sup>, Nino Jakeli<sup>9</sup>, Eliso  
6 Kvavadze<sup>9</sup>, David Lordkipanidze<sup>9</sup>, Zinovi Matzkevich<sup>10</sup>, Tengiz Meshveliani<sup>9</sup>, Brendan J.  
7 Culleton<sup>11</sup>, Douglas J. Kennett<sup>11</sup>, Ron Pinhasi<sup>4</sup> §, David Reich<sup>1,2,12</sup> §  
8

9 <sup>1</sup> Department of Genetics, Harvard Medical School, New Research Building, 77 Ave. Louis Pasteur,  
10 Boston, MA 02115, USA

11 <sup>2</sup> Broad Institute of Harvard and Massachusetts Institute of Technology, Cambridge, MA 02141, USA

12 <sup>3</sup> Institute of Archaeology, The Hebrew University of Jerusalem, Mt. Scopus, Jerusalem 9190501,  
13 Israel

14 <sup>4</sup> Department of Evolutionary Anthropology, University of Vienna, 1090 Vienna, Austria.

15 <sup>5</sup> Earth Institute, University College Dublin, Dublin 4, Ireland.

16 <sup>6</sup> School of Archaeology, University College Dublin, Dublin 4, Ireland.

17 <sup>7</sup> Zinman Institute of Archaeology, University of Haifa, Haifa 3498838, Israel

18 <sup>8</sup> Department of Anthropology, Peabody Museum, Harvard University, Cambridge, MA 02138, USA

19 <sup>9</sup> Georgian National Museum, 3 Putseladze St., Tbilisi 0105, Georgia

20 <sup>10</sup> Israel Antiquities Authority, PO Box 586, Jerusalem 9100402, Israel

21 <sup>11</sup> Department of Anthropology, The Pennsylvania State University, University Park, PA 16802, USA

22 <sup>12</sup> Howard Hughes Medical Institute, Harvard Medical School, Boston, MA 02115, USA  
23

24 § These authors jointly supervised this work  
25  
26

27 **The earliest ancient DNA data of modern humans from Europe dates to ~40 thousand**  
28 **years ago<sup>1-4</sup>, but that from the Caucasus and the Near East to only ~14 thousand years**  
29 **ago<sup>5,6</sup>, from populations who lived long after the Last Glacial Maximum (LGM) ~26.5-**  
30 **19 thousand years ago<sup>7</sup>. To address this imbalance and to better understand the**  
31 **relationship of Europeans and Near Easterners, we report genome-wide data from two**  
32 **~26 thousand year old individuals from Dzudzuana Cave in Georgia in the Caucasus**  
33 **from around the beginning of the LGM. Surprisingly, the Dzudzuana population was**  
34 **more closely related to early agriculturalists from western Anatolia ~8 thousand years**  
35 **ago<sup>8</sup> than to the hunter-gatherers of the Caucasus from the same region of western**  
36 **Georgia of ~13-10 thousand years ago<sup>5</sup>. Most of the Dzudzuana population's ancestry**  
37 **was deeply related to the post-glacial western European hunter-gatherers of the**  
38 **'Villabruna cluster'<sup>3</sup>, but it also had ancestry from a lineage that had separated from**  
39 **the great majority of non-African populations before they separated from each other,**  
40 **proving that such 'Basal Eurasians'<sup>6,9</sup> were present in West Eurasia twice as early as**

41 **previously recorded<sup>5,6</sup>. We document major population turnover in the Near East after**  
42 **the time of Dzedzuana, showing that the highly differentiated Holocene populations of**  
43 **the region<sup>6</sup> were formed by ‘Ancient North Eurasian’<sup>3,9,10</sup> admixture into the Caucasus**  
44 **and Iran and North African<sup>11,12</sup> admixture into the Natufians of the Levant. We finally**  
45 **show that the Dzedzuana population contributed the majority of the ancestry of post-**  
46 **Ice Age people in the Near East, North Africa, and even parts of Europe, thereby**  
47 **becoming the largest single contributor of ancestry of all present-day West Eurasians.**

48 Ancient DNA has revealed more about the deep history of Europe than of any other  
49 continent, with dozens of Paleolithic samples reported to date<sup>1-5</sup> (Fig. 1a). Genetic analyses  
50 show that the first populations related to present-day West Eurasians arrived in Europe at  
51 least ~36 thousand years ago (kya)<sup>2</sup>. A new group of populations (Věstonice cluster),  
52 associated with the archaeologically defined Gravettian entity, appeared in the genetic record  
53 of Europe by ~30kya, while another group, associated with the archaeologically defined  
54 Magdalenian culture, appeared in Europe by ~20kya (El Mirón cluster)<sup>3</sup>. By ~14kya a third  
55 group, the Villabruna cluster, appeared throughout mainland Europe, coinciding with the  
56 Bølling-Allerød warming period<sup>3</sup>. Members of this cluster, which has also been called  
57 western European hunter-gatherers (WHG), were found across Europe during Late Upper  
58 Paleolithic-to-Mesolithic times, and were the main pre-agricultural Europeans prior to the  
59 Neolithic ~8kya<sup>9</sup>.

60 In contrast to this detailed knowledge about Europe during the Paleolithic, no Ice Age DNA  
61 has been published from the Near East (including the Caucasus) whose post-glacial and  
62 Holocene-era populations <15kya were highly differentiated from both those of Europe and  
63 also from each other<sup>5,6,8,13,14</sup>. To address this deficit, we analyzed teeth from two individuals  
64 recovered from Dzedzuana Cave<sup>15</sup>, Southern Caucasus, (Fig. 1a; Supplementary Information  
65 section 1) from an archaeological layer previously dated to ~27-24kya and whose age  
66 determination was confirmed by a series of 8 new dates (Extended Data Figure 1;  
67 Supplementary Information section 1), thus allowing us to probe a population on the cusp of  
68 the beginning of the LGM. Of the two individuals, one yielded data at a total of 185,744  
69 targeted single nucleotide polymorphisms (SNPs) on chromosomes 1-22 (I2949, Dzu2, Upper  
70 Area square H16b), while the other yielded 90,916 SNPs (I2963, Dzu3, Lower Area square  
71 18b). Both individuals had mitochondrial DNA sequences (U6 and N) that are consistent with  
72 deriving from lineages that are rare in the Caucasus or Europe today. The two individuals

73 were genetically similar to each other, consistent with belonging to the same population  
74 (Extended Data Fig. 2) and we thus analyze them jointly.

75 The Dzdzuana samples represent the earliest ancient modern human DNA outside of  
76 Europe, Siberia, and China (Fig. 1b). In the local context, they help us answer the question of  
77 the relationship of Ice Age populations of the region to their post-glacial successors<sup>5</sup>: was  
78 there discontinuity in the Caucasus as in Europe? A broader issue that we wished to address  
79 is the changing relationship between human populations from Europe and the Near East, as  
80 the Caucasus is situated at the border between them. The Villabruna cluster has been modeled  
81 as contributing to both the ~30kya Věstonice and ~20kya El Mirón-cluster populations<sup>3</sup>,  
82 suggesting that it must have existed somewhere in relatively unmixed form long before the  
83 oldest genetic data we have from it at ~14kya<sup>3,5</sup>. However, it is unlikely that the Villabruna  
84 cluster sojourned in mainland Europe, as members of the cluster have been attested there only  
85 by ~14kya, marking an increased affinity of these European populations of the time to Near  
86 Eastern ones<sup>3</sup>. Was there migration at the time from mainland Europe to the Near East or vice  
87 versa, or, indeed from a geographically intermediate Ice Age refugium in southeast Europe,  
88 Anatolia, or the circum-Pontic (Black Sea) region that might explain the affinity of post-  
89 glacial Levantine and Anatolian populations to those of Europe<sup>6</sup>? It is also unknown how the  
90 affinity between early populations in the eastern European-Caucasus-Iran zone<sup>6</sup> first arose.  
91 Eastern European hunter-gatherers (EHG)<sup>16</sup> ~8kya can be modeled as a mixture of peoples of  
92 WHG and Upper Paleolithic Siberians first known ~24kya<sup>10</sup> (also known as ‘Ancient North  
93 Eurasians’ (ANE)). Caucasus hunter-gatherers (CHG)—sampled in Georgia in Satsurblia and  
94 Kotias Klde caves <50km from Dzdzuana<sup>5</sup>—were genetically intermediate between EHG  
95 and the first agriculturalists of Iran sampled from the Zagros mountains (Iran\_N; ~10kya)<sup>6,13</sup>.

96 We first estimated  $F_{ST}$ , a measure of population genetic differentiation, to assess the genetic  
97 relationships between ancient West Eurasian populations (Extended Data Table 1; Methods).  
98 Post-glacial Near Easterners and North Africans (PGNE) (CHG, Natufians, Taforalt<sup>11</sup> Ibero-  
99 Maurusians from North Africa, and early Neolithic farmers from Anatolia<sup>8</sup>, Iran<sup>6</sup>, the  
100 Levant<sup>6</sup>, and the Maghreb<sup>17</sup>) are strongly differentiated from all European and Siberian  
101 hunter-gatherers (ESHG) ( $F_{ST} = 0.078-0.267$ ). By contrast, Dzdzuana is genetically closer  
102 to both contemporaneous Gravettians from Europe ( $0.051 \pm 0.012$ ) and also to the much later  
103 Neolithic Anatolian farmers ( $0.039 \pm 0.005$ ) who are genetically closest to them according to  
104 this measure. Genetic drift inflates  $F_{ST}$  over time, so the affinity to the Gravettians may partly

105 be due to the great age of these samples. However, age cannot explain the affinity to much  
106 later Neolithic Anatolians of ~8kya, a population closer to Dzudzuana than any other PGNE  
107 (0.052–0.195).

108 Outgroup  $f_3$ -statistics<sup>10</sup> show that Dzudzuana clusters with Near Eastern populations  
109 primarily from Anatolia and secondarily from the Levant, but not with the geographically  
110 proximate CHG (Extended Data Fig. 3). A genetic relationship between Dzudzuana and  
111 Neolithic Anatolians is also shown by principal components analysis (PCA) in the space of  
112 ‘outgroup  $f_4$ -statistics’<sup>16</sup> of the form  $f_4(\text{Test}, O_1; O_2, O_3)$  where  $(O_1; O_2, O_3)$  is a triple of  
113 outgroups (Fig. 1c; Methods); performing PCA on the space defined by these statistics has  
114 the advantage of not being affected by genetic drift peculiar to the *Test* populations. It also  
115 allows us to visualize genetic relationships between ancient populations alone, without  
116 projecting onto the variation of present-day people. European hunter-gatherers in our analysis  
117 form a cline with Villabruna/WHG samples on one end and ANE on the other. None of the  
118 PGNE populations other than the Neolithic Anatolians cluster with the Ice Age Caucasus  
119 population from Dzudzuana. As reported previously, present-day West Eurasians are much  
120 more homogeneous than ancient ones, reflecting extensive post-Neolithic admixture<sup>6</sup>.  
121 However, they continue to be differentially related to ancient local populations in Europe and  
122 the Near East (Extended Data Fig. 4).

123 To better understand the relationship of Dzudzuana to other ancient West Eurasian  
124 populations, we performed symmetry testing using  $f$ -statistics<sup>18</sup> (Extended Data Fig. 5). These  
125 analyses show that ESHG share more alleles with Dzudzuana than with PGNE populations,  
126 except Neolithic Anatolians who form a clade with Dzudzuana to the exclusion of ESHG  
127 (Extended Data Fig. 5a). Thus, our results prove that the European affinity of Neolithic  
128 Anatolians<sup>6</sup> does not necessarily reflect any admixture into the Near East from Europe, as an  
129 Anatolian Neolithic-like population already existed in parts of the Near East by ~26kya.  
130 Furthermore, Dzudzuana shares more alleles with Villabruna-cluster groups than with other  
131 ESHG (Extended Data Fig. 5b), suggesting that this European affinity was specifically  
132 related to the Villabruna cluster, and indicating that the Villabruna affinity of PGNE  
133 populations from Anatolia and the Levant is not the result of a migration into the Near East  
134 from Europe. Rather, ancestry deeply related to the Villabruna cluster was present not only in  
135 Gravettian and Magdalenian-era Europeans<sup>3</sup> but also in the populations of the Caucasus, by  
136 ~26kya. Neolithic Anatolians, while forming a clade with Dzudzuana with respect to ESHG  
137 (Extended Data Fig. 5a), share more alleles with all other PGNE (Extended Data Fig. 5d),

138 suggesting that PGNE share at least partially common descent to the exclusion of the much  
139 older samples from Dzudzuana.

140 All known ancient Near Eastern populations prior to this work were inferred to harbor ‘Basal  
141 Eurasian’ ancestry<sup>9</sup>, a branch that diverged from all other non-Africans (including ESHG and  
142 present-day East Asians and Oceanians) before they split from each other. The CHG,  
143 geographically intermediate between Europe and the Near East resembled Near Eastern  
144 populations in the possession of Basal Eurasian ancestry<sup>5</sup>. The Dzudzuana population was not  
145 identical to the WHG, as it shared fewer alleles with both an early Upper Paleolithic Siberian  
146 (Ust’Ishim<sup>19</sup>) and an early Upper Paleolithic East Asian (Tianyuan<sup>20</sup>) (Extended Data Fig.  
147 5c), thus, it too—like the PGNE populations—had Basal Eurasian ancestry<sup>6,9</sup>. The detection  
148 of this type of ancestry, twice as early as previously documented<sup>5,6</sup> and at the northern edge  
149 of the Near East, lends weight to the hypothesis that it represents a deep Near Eastern lineage  
150 rather than a recent arrival from Africa<sup>6</sup>.

151 We used qpGraph<sup>18</sup> to build an admixture graph model of the relationship between ESHG  
152 and Dzudzuana, also including the earliest PGNE populations from North Africa (Taforalt)  
153 and the Epipaleolithic Levant (Natufians) (Fig. 2). While potentially oversimplifying the  
154 history of these populations by considering only discrete binary admixture events as opposed  
155 to continuous gene flow, the model is useful for its insights into possible evolutionary  
156 relationships between populations and for representing the minimum complexity that these  
157 relationships had. According to this model, a common population contributed ancestry to  
158 Gravettians (represented by Vestonice16) and to a “Common West Eurasian” population that  
159 contributed all the ancestry of Villabruna and most of the ancestry of Dzudzuana which also  
160 had 28.4±4.2% Basal Eurasian ancestry<sup>21</sup> (Supplementary Information section 2).

161 Our co-modeling of Epipaleolithic Natufians and Ibero-Maurusians from Taforalt confirms  
162 that the Taforalt population was mixed<sup>11</sup>, but instead of specifying gene flow from the  
163 ancestors of Natufians into the ancestors of Taforalt as originally reported, we infer gene flow  
164 in the reverse direction (into Natufians). The Neolithic population from Morocco, closely  
165 related to Taforalt<sup>17</sup> is also consistent with being descended from the source of this gene flow,  
166 and appears to have no admixture from the Levantine Neolithic (Supplementary Information  
167 section 3). If our model is correct, Epipaleolithic Natufians trace part of their ancestry to  
168 North Africa, consistent with morphological and archaeological studies that indicate a spread  
169 of morphological features<sup>22</sup> and artifacts from North Africa into the Near East. Such a

170 scenario would also explain the presence of Y-chromosome haplogroup E in the Natufians  
171 and Levantine farmers<sup>6</sup>, a common link between the Levant and Africa. Moreover, our model  
172 predicts that West Africans (represented by Yoruba) had 12.5±1.1% ancestry from a Taforalt-  
173 related group rather than Taforalt having ancestry from an unknown Sub-Saharan African  
174 source<sup>11</sup>; this may have mediated the limited Neanderthal admixture present in West  
175 Africans<sup>23</sup>. An advantage of our model is that it allows for a local North African component  
176 in the ancestry of Taforalt, rather than deriving them exclusively from Levantine and Sub-  
177 Saharan sources.

178 We also used the qpWave/qpAdm framework<sup>16</sup> to model ancient populations without strong  
179 phylogenetic assumptions (Supplementary Information section 3; Table 1). This analysis  
180 shows that we cannot reject the hypothesis that Dzudzuana and the much later Neolithic  
181 Anatolians form a clade with respect to ESHG (P=0.286), consistent with the latter being a  
182 population largely descended from Dzudzuana-like pre-Neolithic populations whose  
183 geographical extent spanned both Anatolia and the Caucasus. Dzudzuana itself can be  
184 modeled as a 2-way mixture of Villabruna-related ancestry and a Basal Eurasian lineage.  
185 Western PGNE populations, including Neolithic Anatolians, pre-pottery Neolithic farmers  
186 from the Levant (PPNB), Natufians, and Taforalt, can all be modeled as a mixture of  
187 Dzudzuana and additional ‘Deep’ ancestry that may represent an even earlier split than the  
188 Basal Eurasians. Considering 2-way mixtures, we can model Karelia\_HG as deriving  
189 34±2.8% of its ancestry from a Villabruna-related source, with the remainder mainly from  
190 ANE represented by the AfontovaGora3 (AG3) sample from Lake Baikal<sup>3</sup> ~17kya. Finally,  
191 we can model CHG and samples from Neolithic Iran (Iran\_N) as deriving their ancestry  
192 largely (~58-64% using qpAdm and ~45-62% using qpGraph) from a Dzudzuana-like  
193 population, but with ancestry from both ‘Deep’ and ANE sources, thus proving that ANE  
194 ancestry had reached Western Eurasia long before the Bronze Age Eurasian steppe  
195 migrations that carried further westward into mainland Europe.

196 In qpAdm modeling, a deeply divergent hunter-gatherer lineage that contributed in relatively  
197 unmixed form to the much later hunter-gatherers of the Villabruna cluster is specified as  
198 contributing to earlier hunter-gatherer groups (Gravettian Vestonice16: 35.7±11.3% and  
199 Magdalenian ElMiron: 60.6±11.3%) and to populations of the Caucasus (Dzudzuana:  
200 72.5±3.7%, virtually identical to that inferred using ADMIXTUREGRAPH). In Europe,  
201 descendants of this lineage admixed with pre-existing hunter-gatherers related to Sunghir3  
202 from Russia<sup>4</sup> for the Gravettians and GoyetQ116-1 from Belgium<sup>3</sup> for the Magdalenians,



203 while in the Near East it did so with Basal Eurasians. Later Europeans prior to the arrival of  
204 agriculture were the product of re-settlement of this lineage after ~15kya in mainland Europe,  
205 while in eastern Europe they admixed with Siberian hunter-gatherers forming the WHG-ANE  
206 cline of ancestry (Fig. 1c). In the Near East, the Dzudzuana-related population admixed with  
207 North African-related ancestry in the Levant and with Siberian hunter-gatherer and eastern  
208 non-African-related ancestry in Iran and the Caucasus. Thus, the highly differentiated  
209 populations at the dawn of the Neolithic<sup>6</sup> were primarily descended from Villabruna Cluster  
210 and Dzudzuana-related ancestors, with varying degrees of additional input related to both  
211 North Africa and Ancient North/East Eurasia whose proximate sources may be clarified by  
212 future sampling of geographically and temporally intermediate populations.

213 The ancestry of present-day Europeans has been traced to the proximate sources of  
214 Mesolithic hunter-gatherers, Early European/Anatolian farmers, and steppe pastoralists<sup>16</sup>, but  
215 the ancestry of Near Eastern and North African populations has not been investigated due to  
216 lack of appropriate ancient sources. We present a unified analysis of diverse European, Near  
217 Eastern, North African populations in terms of the deepest known sources of ancestry (Fig.  
218 3), which suggests that Dzudzuana-related ancestry makes up ~46-88% of the ancestry of all  
219 these populations, with Dzudzuana-related ancestry more strongly found in southern  
220 populations across West Eurasia (Fig. 3; Extended Data Fig. 6). Dzudzuana-like ancestry  
221 must have spread across West Eurasia with Neolithic migrations out of the Near East, but it  
222 had not been previously completely absent from Europe as several hunter-gatherer  
223 populations in southeastern Europe, eastern Europe, and Scandinavia can only be modeled  
224 with some such ancestry (Extended Data Fig. 6; Supplementary Information section 4). Both  
225 Europeans and Near Easterners also share in AG3-related ancestry of up to ~30% in eastern  
226 Europe down to ~0% in parts of North Africa. Europeans are differentiated by an excess of  
227 up to ~20% Villabruna-related ancestry relative to non-European populations and also by a  
228 relative lack of extra 'Deep' ancestry compared to the Near East and North Africa, a type of  
229 ancestry that may only partially be explained by the Basal Eurasian ancestry of ancient West  
230 Eurasian populations and must also trace to Africa (Extended Data Fig. 7). 'Deep' ancestry,  
231 including Basal Eurasian ancestry, is associated with reduced Neandertal ancestry  
232 (Supplementary Information section 5, Extended Data Fig. 8), confirming that Neandertal  
233 ancestry in West Eurasia<sup>6</sup> has been diluted by admixture.

234 Future studies must investigate when Dzudzuana-like populations first formed: does the  
235 Basal Eurasian component represent the earliest Near Eastern population stratum or a later

236 accretion? What were the mechanisms and proximate sources of the Siberian- and North  
237 African-related ancestry that affected West Eurasia? We caution that the inference of  
238 Dzudzuana-related ancestry as the core component of ancient and present-day West Eurasia  
239 does not constitute proof for migrations specifically from the Caucasus: given that this is the  
240 only ancient DNA data from this time period and broad region, the geographical and  
241 temporal extent of this population and its relatives remains unknown. Both in its past (formed  
242 by admixture with Basal Eurasians), and in its future (admixing with populations from  
243 Africa, Europe, and Siberia in post-glacial, Neolithic, and later periods), Dzudzuana stands in  
244 the middle of an ongoing process of admixture of diverse elements from which West  
245 Eurasians, in all their diversity, eventually formed.

- 246 1. Fu, Q. *et al.* An early modern human from Romania with a recent Neanderthal ancestor.  
247 *Nature* **524**, 216-219, (2015).
- 248 2. Seguin-Orlando, A. *et al.* Genomic structure in Europeans dating back at least 36,200 years.  
249 *Science* **346**, 1113-1118, (2014).
- 250 3. Fu, Q. *et al.* The genetic history of Ice Age Europe. *Nature* **534**, 200-205, (2016).
- 251 4. Sikora, M. *et al.* Ancient genomes show social and reproductive behavior of early Upper  
252 Paleolithic foragers. *Science*, (2017).
- 253 5. Jones, E. R. *et al.* Upper Palaeolithic genomes reveal deep roots of modern Eurasians. *Nat.*  
254 *Commun.* **6**, 8912, (2015).
- 255 6. Lazaridis, I. *et al.* Genomic insights into the origin of farming in the ancient Near East.  
256 *Nature* **536**, 419-424, (2016).
- 257 7. Clark, P. U. *et al.* The Last Glacial Maximum. *Science* **325**, 710, (2009).
- 258 8. Mathieson, I. *et al.* Genome-wide patterns of selection in 230 ancient Eurasians. *Nature* **528**,  
259 499-503, (2015).
- 260 9. Lazaridis, I. *et al.* Ancient human genomes suggest three ancestral populations for present-  
261 day Europeans. *Nature* **513**, 409-413, (2014).
- 262 10. Raghavan, M. *et al.* Upper Palaeolithic Siberian genome reveals dual ancestry of Native  
263 Americans. *Nature* **505**, 87-91, (2014).
- 264 11. van de Loosdrecht, M. *et al.* Pleistocene North African genomes link Near Eastern and sub-  
265 Saharan African human populations. *Science*, (2018).
- 266 12. Fregel, R. *et al.* Neolithization of North Africa involved the migration of people from both the  
267 Levant and Europe. *bioRxiv*, (2017).
- 268 13. Broushaki, F. *et al.* Early Neolithic genomes from the eastern Fertile Crescent. *Science* **353**,  
269 499-503, (2016).
- 270 14. Kılınç, Gülşah M. *et al.* The Demographic Development of the First Farmers in Anatolia.  
271 *Curr. Biol.* **26**, 2659–2666, (2016).
- 272 15. Bar-Yosef, O. *et al.* Dzudzuana: an Upper Palaeolithic cave site in the Caucasus foothills  
273 (Georgia). *Antiquity* **85**, 331-349, (2015).
- 274 16. Haak, W. *et al.* Massive migration from the steppe was a source for Indo-European languages  
275 in Europe. *Nature* **522**, 207-211, (2015).
- 276 17. Fregel, R. *et al.* Ancient genomes from North Africa evidence prehistoric migrations to the  
277 Maghreb from both the Levant and Europe. *Proceedings of the National Academy of*  
278 *Sciences*, (2018).
- 279 18. Patterson, N. *et al.* Ancient admixture in human history. *Genetics* **192**, 1065-1093, (2012).
- 280 19. Fu, Q. *et al.* Genome sequence of a 45,000-year-old modern human from western Siberia.  
281 *Nature* **514**, 445-449, (2014).
- 282 20. Yang, M. A. *et al.* 40,000-Year-Old Individual from Asia Provides Insight into Early  
283 Population Structure in Eurasia. *Curr. Biol.* **27**, 3202-3208.e3209, (2017).



- 284 21. Busing, F. T. A., Meijer, E. & Leeden, R. Delete-m Jackknife for Unequal m. *Statistics and*  
285 *Computing* **9**, 3-8, (1999).
- 286 22. Ferembach, D. Squelettes du Natoufien d'Israel., etude anthropologique. . *L'Anthropologie* **65**,  
287 46-66, (1961).
- 288 23. Prufer, K. *et al.* The complete genome sequence of a Neanderthal from the Altai Mountains.  
289 *Nature* **505**, 43-49, (2014).
- 290

291 **Figure 1. Ancient West Eurasian population structure.** (a) Geographical distribution of  
 292 key ancient West Eurasian populations. (b) Temporal distribution of key ancient West  
 293 Eurasian populations (approximate date in ky BP). (c) PCA of key ancient West Eurasians,  
 294 including additional populations (shown with grey shells), in the space of outgroup  $f_4$ -  
 295 statistics (Methods).

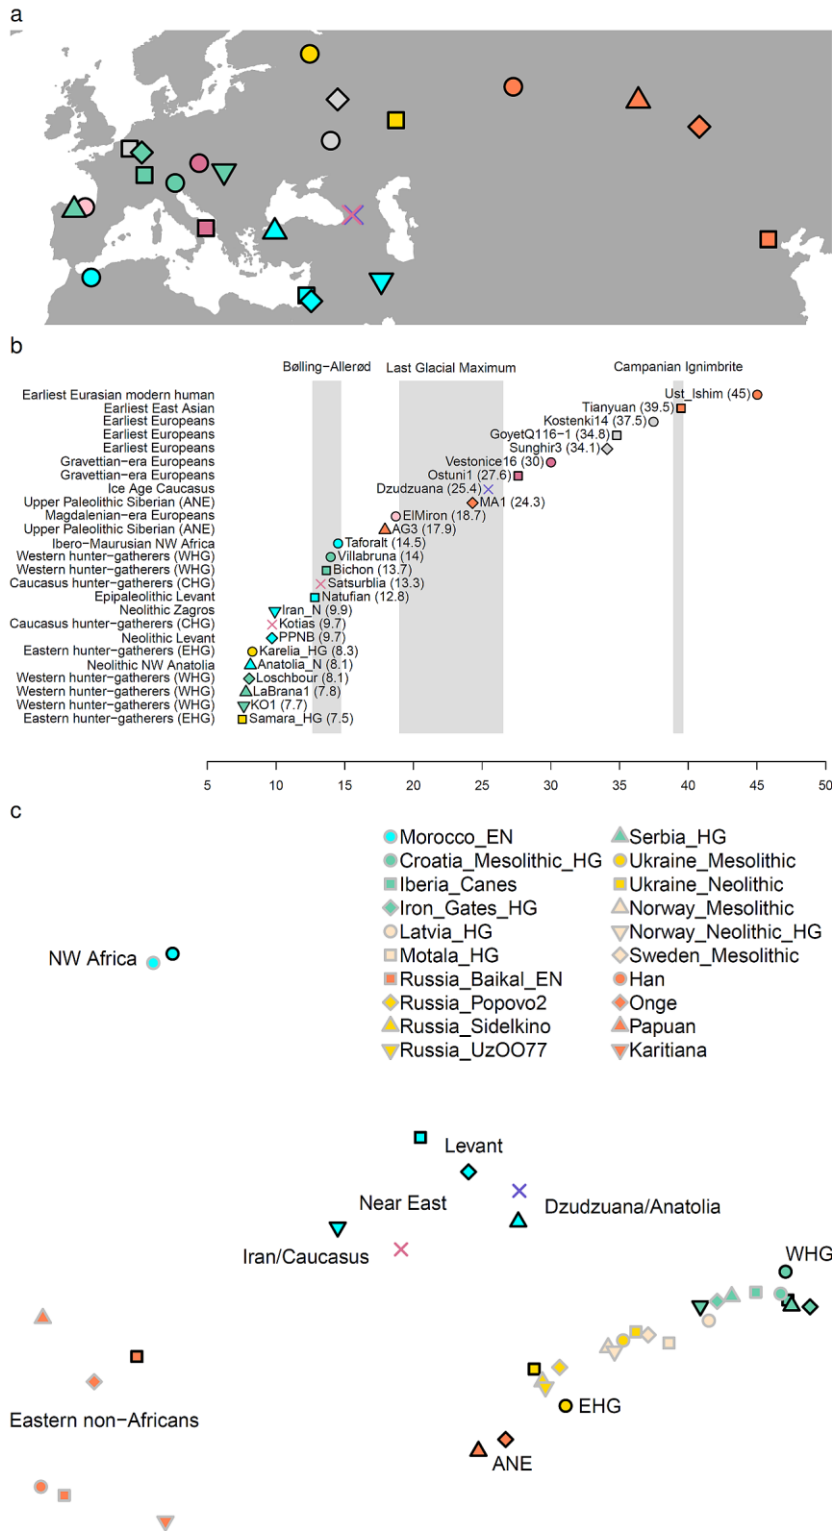

297 **Figure 2. An admixture graph model of Paleolithic West Eurasians.** An automatically  
298 generated admixture graph models fits 14 populations (worst Z-score of the difference  
299 between estimated and fitted  $f$ -statistics is 2.7) or 15 populations (also including  
300 South\_Africa\_HG, worst Z-score is 3.5). This is a simplified model assuming binary  
301 admixture events and is not a unique solution (Supplementary Information section 2).  
302 Sampled populations are shown with ovals and select labeled internal nodes with rectangles.

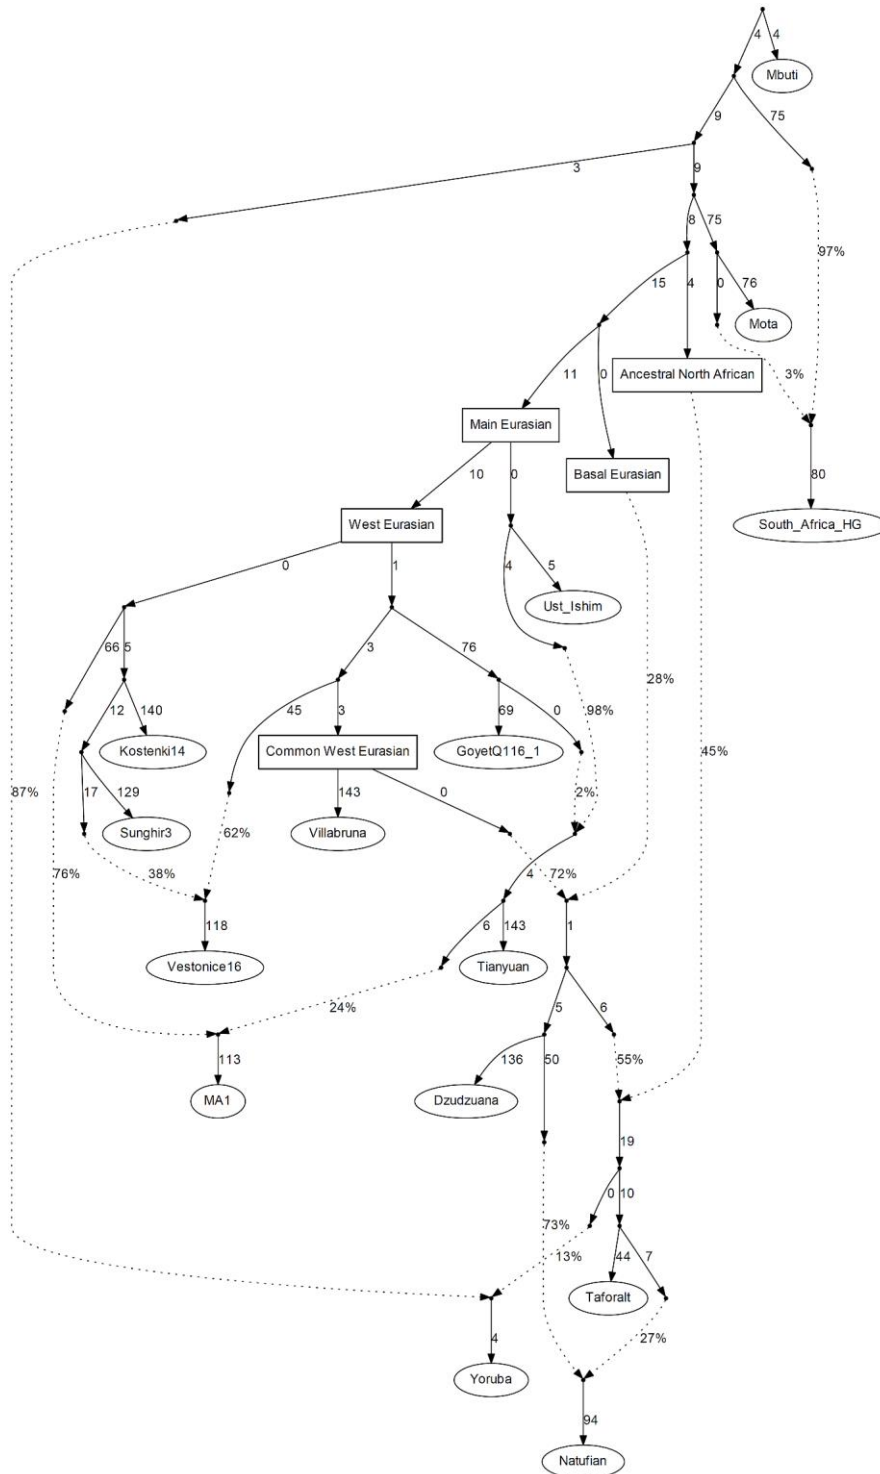

303

304

305 **Figure 3: Modeling present-day West Eurasians and North Africans.** Mixture  
306 proportions can be found in Extended Data Fig. 6 and Supplementary Information section 4.  
307 Ancestry with Mbuti as a source reflects all ‘Deep’ ancestry from lineages that split off prior  
308 to the 45kya Ust’Ishim. Jewish populations are shown with squares to visually distinguish  
309 them from geographically proximate populations.

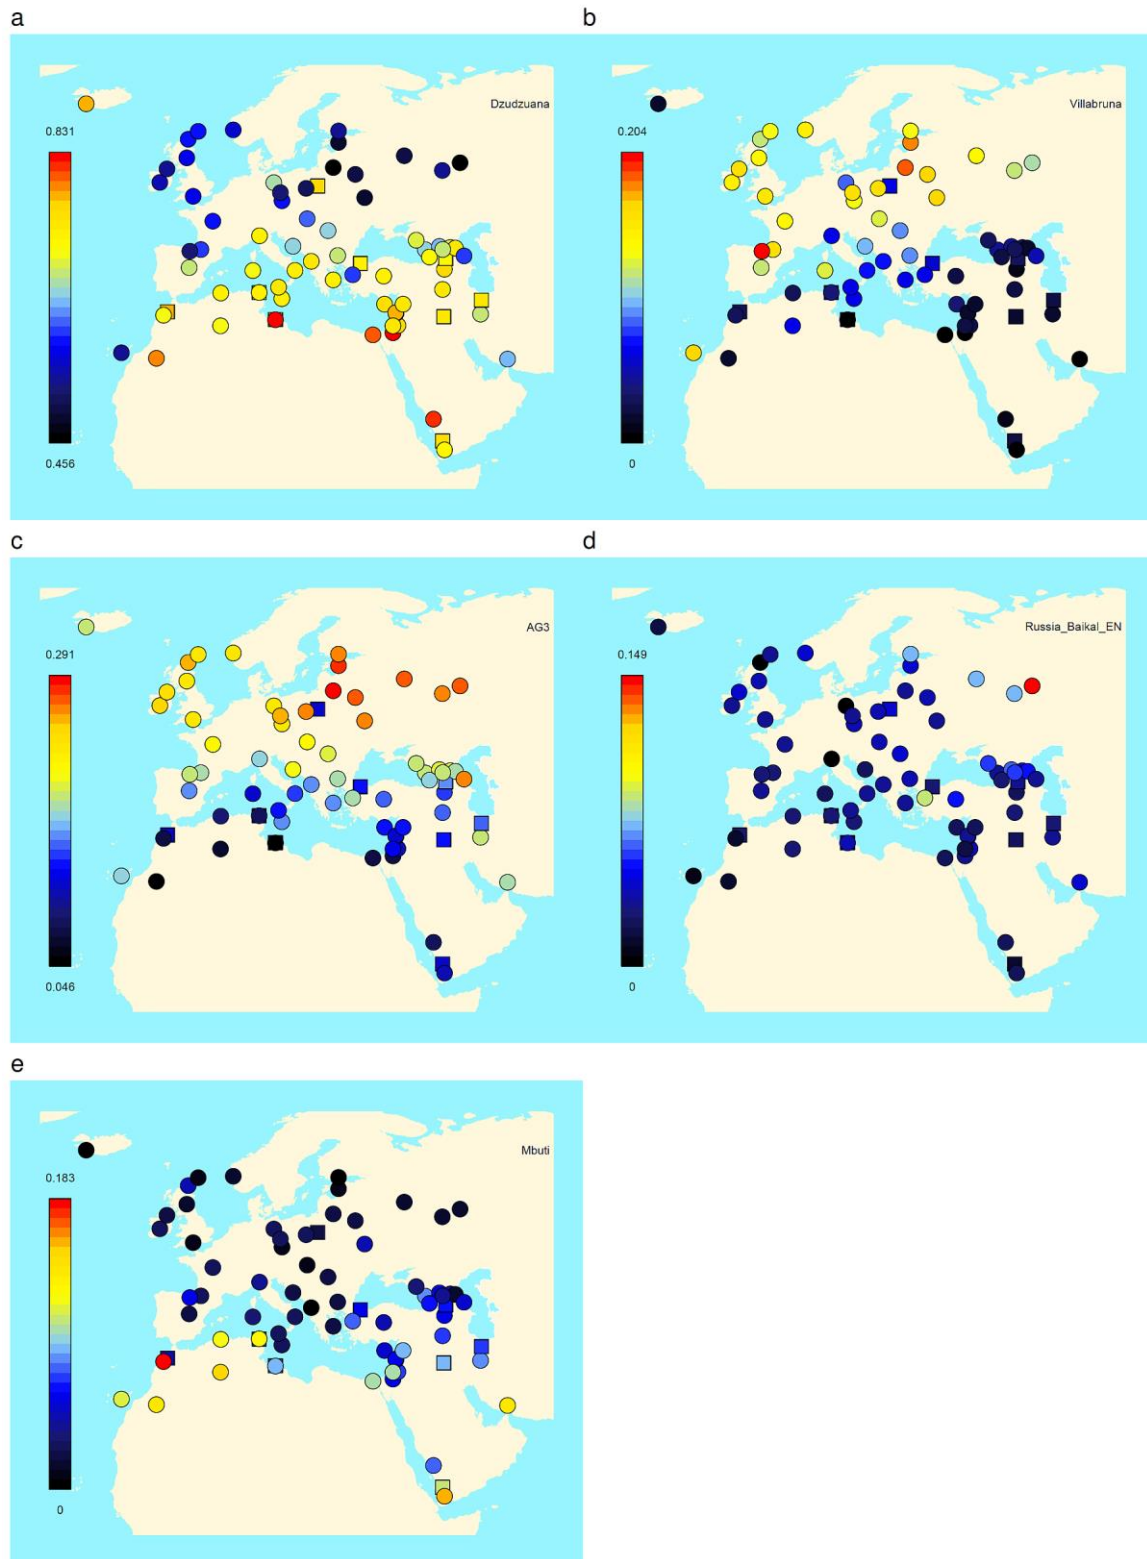

311 **Table 1: Mixture proportions of ancient populations.** The model with the fewest sources  
 312 for each population that fits the data is shown. Multiple models may fit some populations; we  
 313 show here the one with the highest P-value; others are shown in Supplementary Information  
 314 section 3. The P-value is (for  $N$  sources) for rank  $N-1$  of (Test, Sources) with respect to a set  
 315 of diverse outgroups (Supplementary Information section 3). Neolithic Near Eastern  
 316 populations (four bottom rows) can also be fit as mixtures of Dzudzuana and Taforalt via  
 317 Natufians.

| Test             | A           | B          | C          | D         | P-value | Mixture Proportions |       |       |       | Standard Errors |       |       |       |  |
|------------------|-------------|------------|------------|-----------|---------|---------------------|-------|-------|-------|-----------------|-------|-------|-------|--|
|                  |             |            |            |           |         | A                   | B     | C     | D     | A               | B     | C     | D     |  |
| AG3              | MA1         |            |            |           | 0.107   | 1.000               |       |       |       |                 |       |       |       |  |
| Anatolia_N       | Dzudzuana   |            |            |           | 0.286   | 1.000               |       |       |       |                 |       |       |       |  |
| CHG              | Mbuti       | Tianyuan   | AG3        | Dzudzuana | 0.685   | 0.054               | 0.081 | 0.222 | 0.643 | 0.040           | 0.028 | 0.031 | 0.041 |  |
| Dzudzuana        | Mbuti       | Villabruna |            |           | 0.274   | 0.275               | 0.725 |       |       | 0.037           | 0.037 |       |       |  |
| ElMiron          | GoyetQ116-1 | Villabruna |            |           | 0.167   | 0.394               | 0.606 |       |       | 0.118           | 0.118 |       |       |  |
| Iran_N           | Mbuti       | Onge       | AG3        | Dzudzuana | 0.129   | 0.097               | 0.109 | 0.218 | 0.577 | 0.047           | 0.025 | 0.026 | 0.041 |  |
| Karelia_HG       | Han         | AG3        | Villabruna |           | 0.060   | 0.032               | 0.628 | 0.340 |       | 0.015           | 0.029 | 0.028 |       |  |
| Natufian         | Mbuti       | Dzudzuana  |            |           | 0.702   | 0.112               | 0.888 |       |       | 0.022           | 0.022 |       |       |  |
| PPNB             | Mbuti       | Dzudzuana  |            |           | 0.729   | 0.071               | 0.929 |       |       | 0.018           | 0.018 |       |       |  |
| Russia_Baikal_EN | Han         | MA1        |            |           | 0.313   | 0.843               | 0.157 |       |       | 0.016           | 0.016 |       |       |  |
| Taforalt         | Mbuti       | Dzudzuana  |            |           | 0.556   | 0.272               | 0.728 |       |       | 0.024           | 0.024 |       |       |  |
| Morocco_EN       | Taforalt    |            |            |           | 0.060   | 1.000               |       |       |       |                 |       |       |       |  |
| Anatolia_N       | Dzudzuana   | Natufian   |            |           | 0.070   | 0.859               | 0.141 |       |       | 0.029           | 0.029 |       |       |  |
| Natufian         | Dzudzuana   | Taforalt   |            |           | 0.405   | 0.863               | 0.137 |       |       | 0.019           | 0.019 |       |       |  |
| PPNB             | Dzudzuana   | Natufian   |            |           | 0.910   | 0.409               | 0.591 |       |       | 0.042           | 0.042 |       |       |  |

318



319 **Extended Data Figure 1: Dzudzuana Cave.** (a) Section drawing of Dzudzuana Cave.  
320 Location of the two recovered teeth is indicated. (b) Calibrated dates for Layer C, upper pane:  
321 new determinations (Supplementary Information section 1), lower pane: dates from ref.<sup>24</sup>  
322 **a**

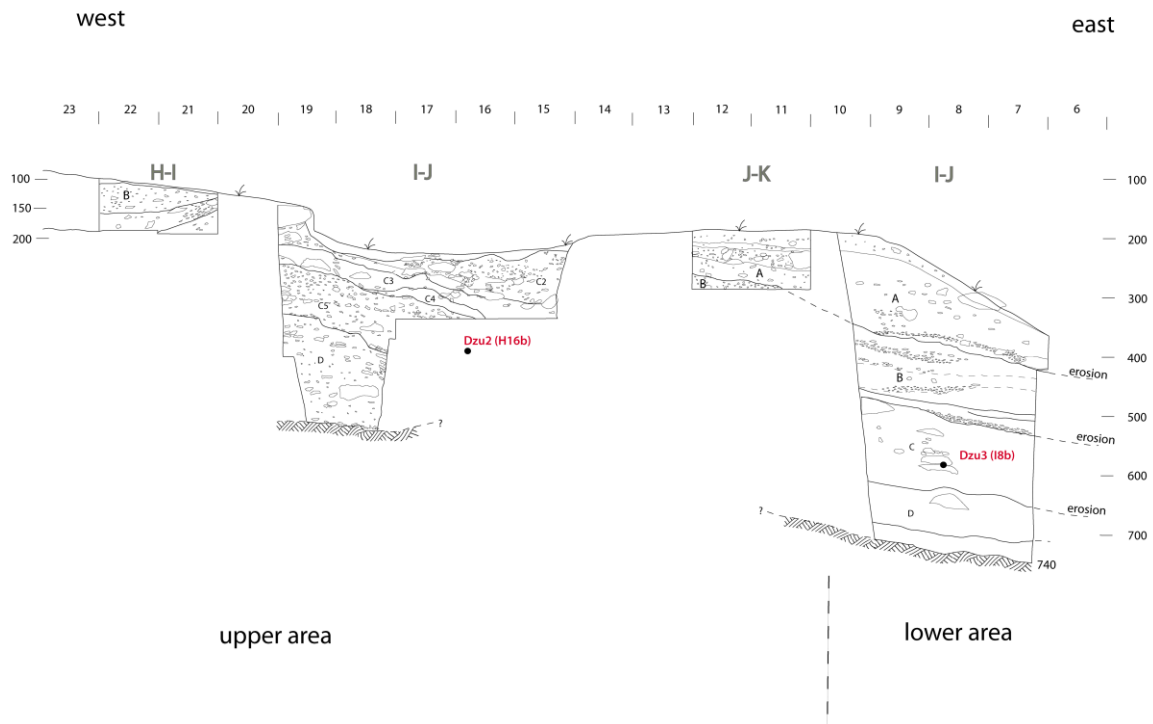

323 **b**

325

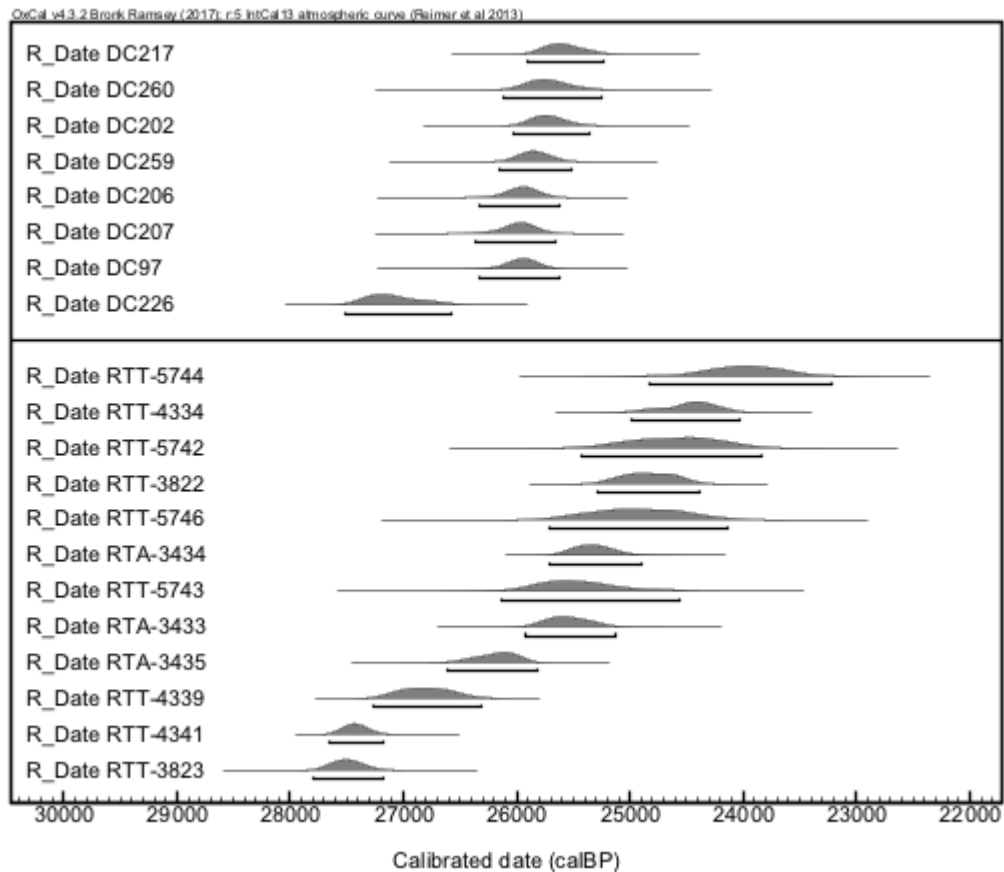

326 **Extended Data Figure 2: Symmetry testing and quality control.** (a) The two Dzudzuana  
 327 individuals are symmetrically related to others ( $|Z| < 2.5$ ). (b) Individual I2949 shares more  
 328 alleles with I2963 than with others ( $Z \in [-0.1, 11.6]$ ). (c) Individual I2963 shares more alleles  
 329 with I2949 than with others ( $Z \in [0.1, 10.5]$ ). (d) Principal components analysis. We repeat the  
 330 analysis of Fig. 1c with the two Dzudzuana individuals shown separately. (e) Analysis of the  
 331 8 libraries separately. (f) Analysis of damage restricted sequences; point shapes and colors  
 332 not shown in legend are identical to Fig. 1.

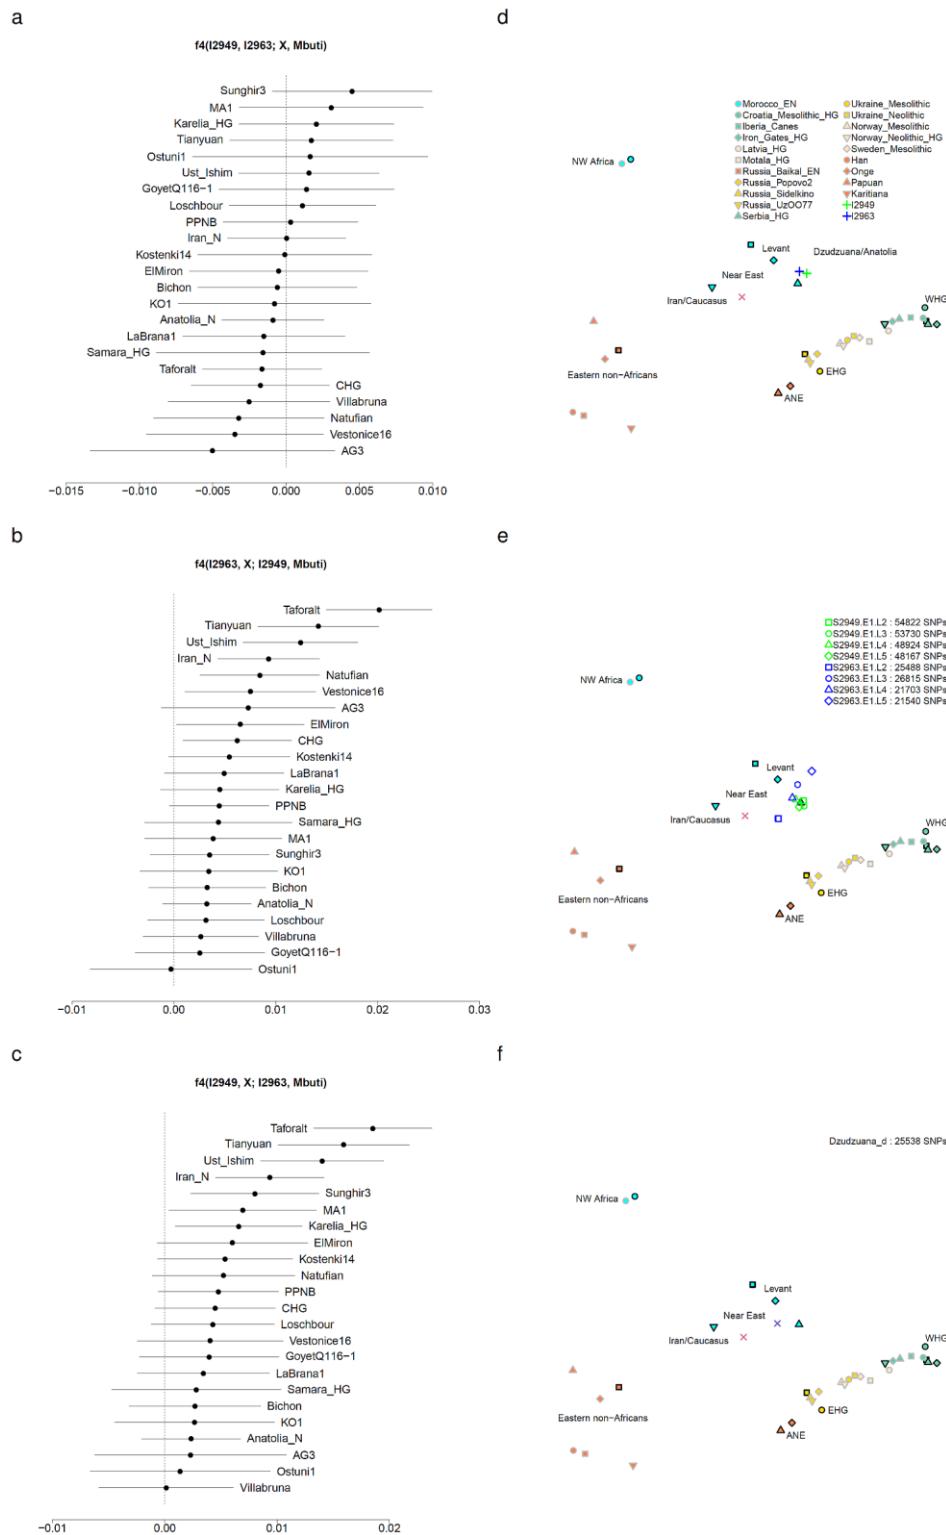

334 **Extended Data Figure 3: Outgroup  $f_3$ -statistics of ancient West Eurasians.** (a) We plot  
 335 pairwise  $f_3(\text{Mbuti}; X, Y)$  for pairs of ancient West Eurasian populations, which measure the  
 336 shared genetic drift between  $X$  and  $Y$  after their separation from an African outgroup (Mbuti  
 337 pygmies). (b) The value of the statistic of panel (a) for  $X=\text{Dzudzuana}$  with  $\pm 3$  standard errors.  
 338 (c) We plot  $f_3(\text{Ust'Ishim and Tianyuan}; X, Y)$ , which measures the shared genetic drift  
 339 between  $X$  and  $Y$  after their separation from non-West Eurasians (made up of the Ust'Ishim  
 340 and Tianyuan individuals of ~40-45kya age). The value of the statistic of panel (c) for  
 341  $X=\text{Dzudzuana}$  with  $\pm 3$  standard errors.

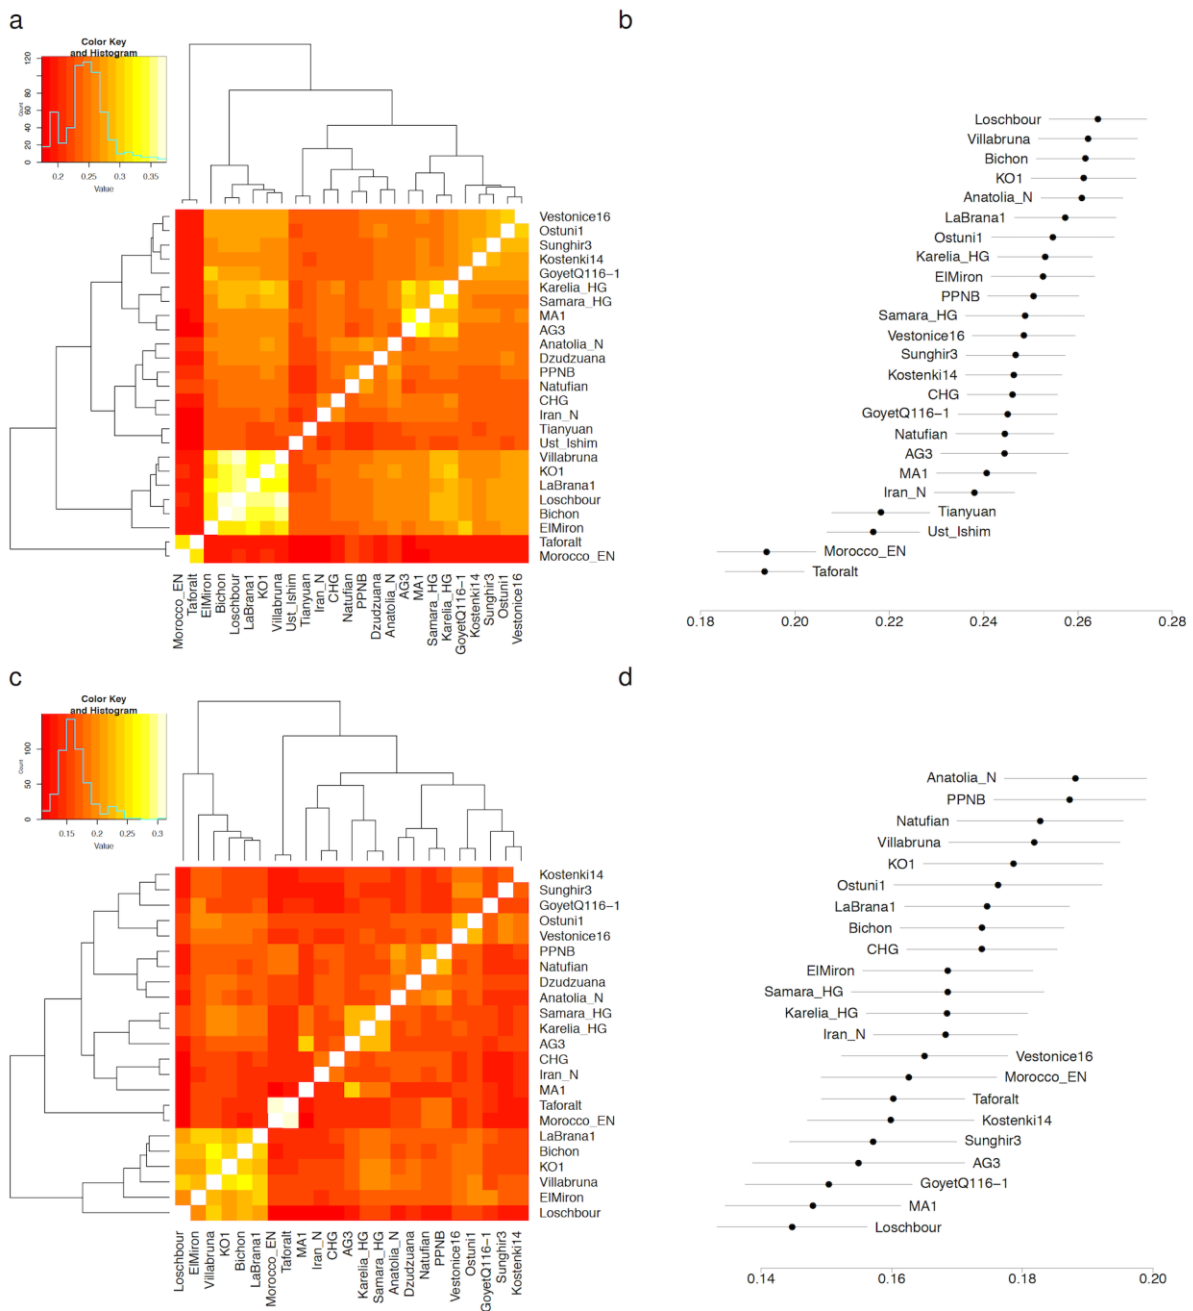

343 **Extended Data Figure 4: Principal components analysis of ancient and present-day**  
 344 **West Eurasians.** (a) View of all samples; present-day populations shown in white-filled  
 345 circles. This corresponds to Fig. 1c, but is computed on Human Origins data. (b) View of  
 346 present-day samples; the legend is split by the median PC1 value and shows a  
 347 correspondence between European (bottom-right) and Near Eastern (top-left) present-day  
 348 populations. Point shapes and colors not shown in legend are identical to Fig. 1.

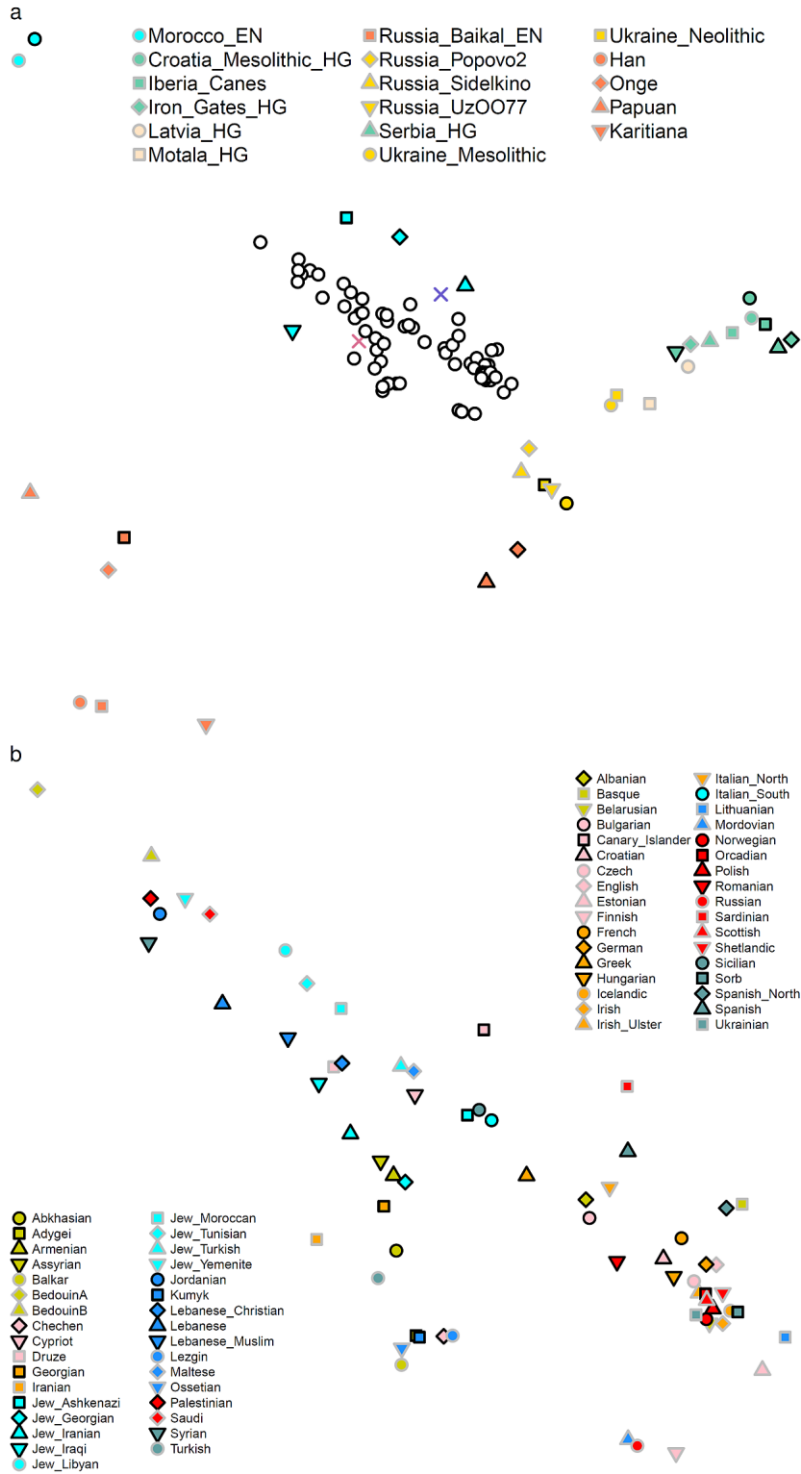

350 **Extended Data Figure 5: Symmetry testing.** In all panels we plot the pair  $(X, Y)$  as a label  
 351 for each statistic which is shown with  $\pm 3$  standard errors (a) The statistic  $f_4(\text{Dzudzuana}, X, Y;$   
 352 Mbuti) shows that diverse European hunter-gatherers  $Y$  share more alleles with Dzudzuana  
 353 than with other ancient Near Eastern populations except for Neolithic Anatolians. (b) The  
 354 statistic  $f_4(\text{Dzudzuana}, \text{Mbuti}; X, Y)$  shows that Dzudzuana shares more alleles with WHG  
 355 (both from the Upper Paleolithic and Mesolithic) than with other European hunter-gatherers.  
 356 (c) The statistic  $f_4(\text{Dzudzuana}, X; Y, \text{Mbuti})$  shows that early Eurasians like Ust'Ishim,  
 357 Tianyuan and eastern non-Africans like Onge and Papuans share more alleles with European  
 358 hunter-gatherers than with Dzudzuana. (d) The statistic  $f_4(\text{Dzudzuana}, \text{Anatolia\_N}; Y, \text{Mbuti})$   
 359 shows that Near Easterners  $Y$  share more alleles with Neolithic Anatolians than with  
 360 Dzudzuana.

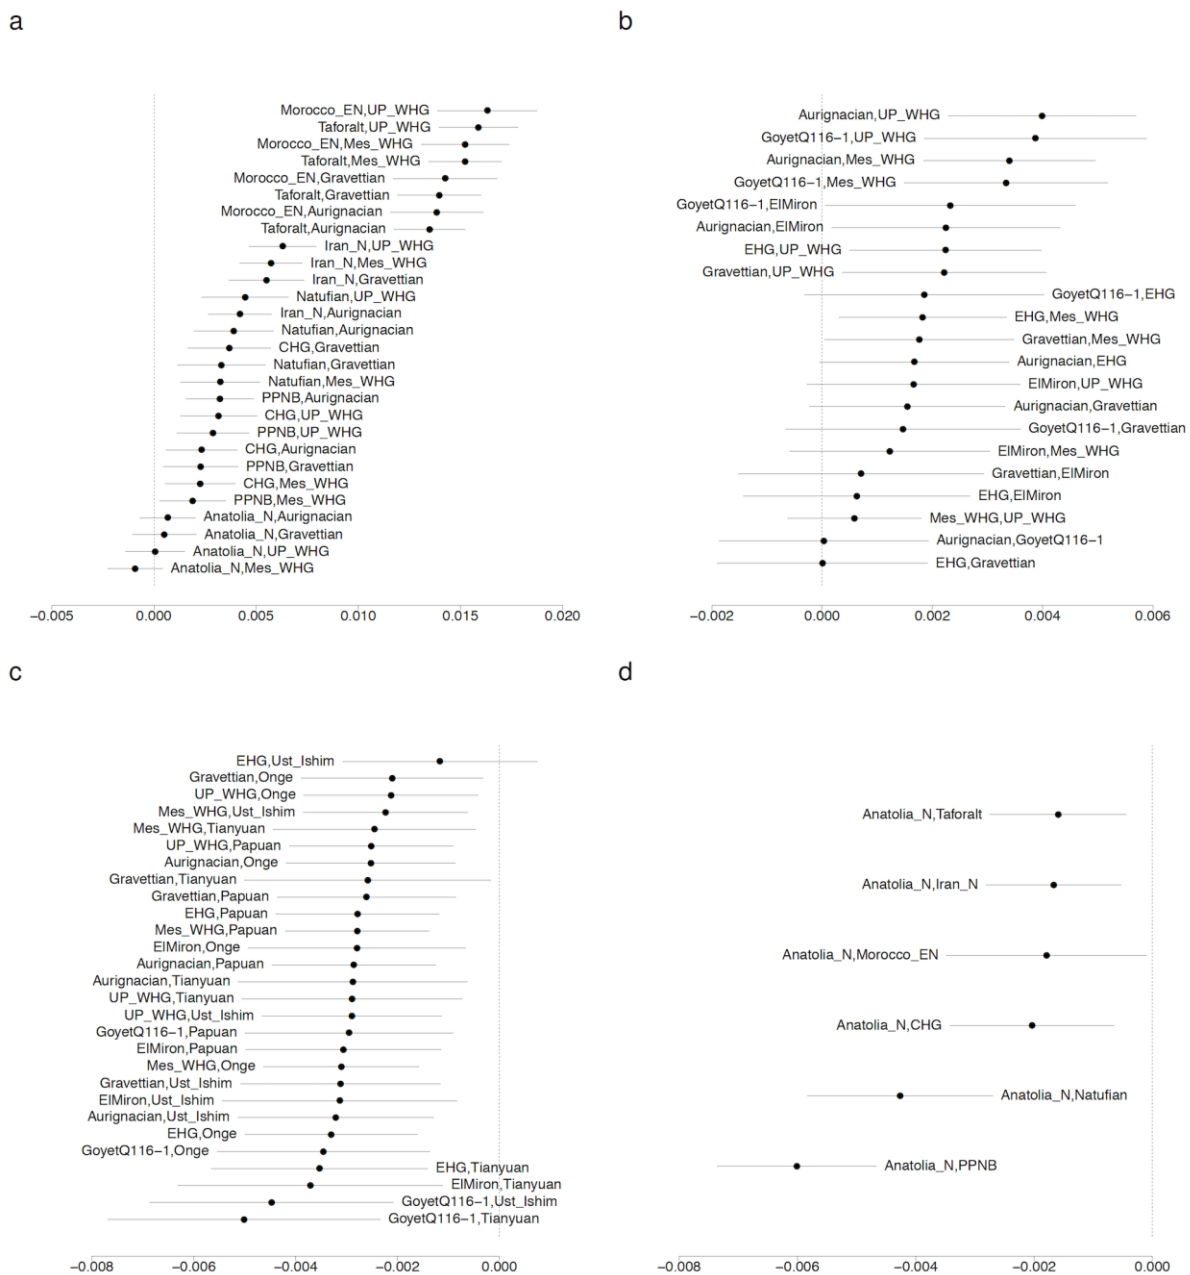

361

362



363 **Extended Data Figure 6: Modeling present-day and ancient West-Eur Asians.** Mixture  
 364 proportions computed with qpAdm (Supplementary Information section 4). The proportion of  
 365 ‘Mbuti’ ancestry represents the total of ‘Deep’ ancestry from lineages that split prior to the  
 366 split of Ust’Ishim, Tianyuan, and West Eurasians and can include both ‘Basal Eurasian’ and  
 367 other (e.g., Sub-Saharan African) ancestry. (a) ‘Conservative’ estimates. Each population  
 368 cannot be modeled with fewer admixture events than shown. (b) ‘Speculative’ estimates. The  
 369 highest number of sources ( $\leq 5$ ) with admixture estimates within  $[0,1]$  are shown for each  
 370 population. Some of the admixture proportions are not significantly different from 0  
 371 (Supplementary Information section 4).

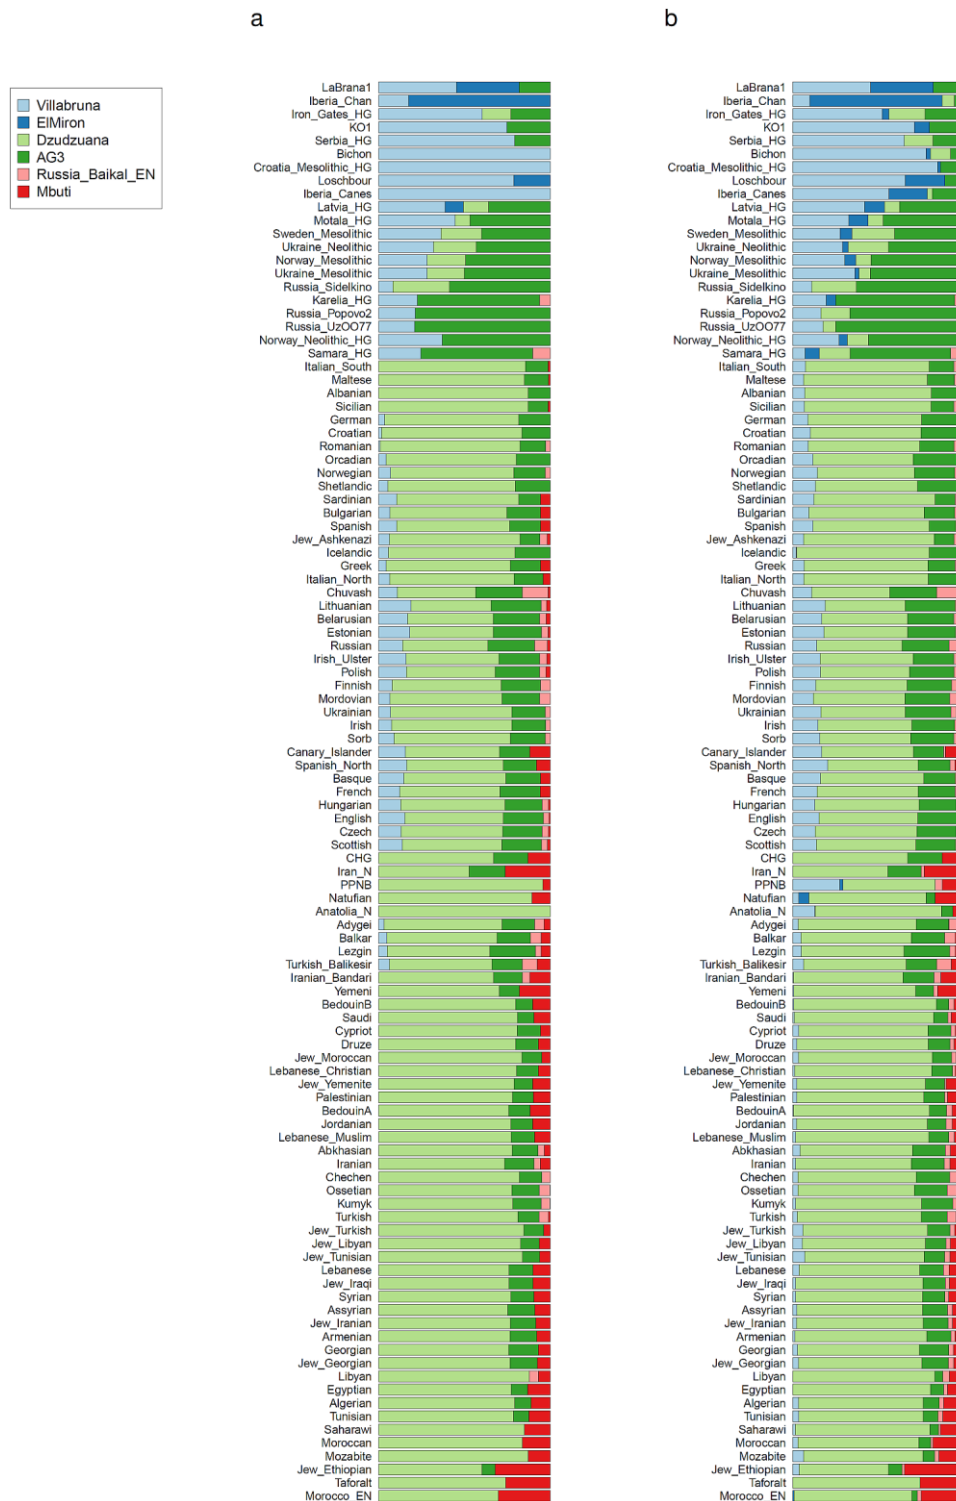

373 **Extended Data Figure 7: Differential relationship of Basal ancestry to Africa.** Basal  
374 ancestry (conservative estimate) is negatively correlated with the statistic  $f_4(X, \text{Kostenki14,}$   
375  $\text{Ust'Ishim, Yoruba)}$  which quantifies allele sharing between  $X$  and Ust'Ishim, consistent with  
376 this type of ancestry diluting the affinity of populations to this 45kya Siberian (earliest known  
377 modern human for which there are genomic data). For Taforalt and some populations from  
378 the Near East and North Africa this statistic is more negative, suggesting that they have North  
379 or Sub-Saharan-related ancestry that cannot be accounted for by any combination of the  
380 ancient West Eurasian sources whose convex hull is shown.

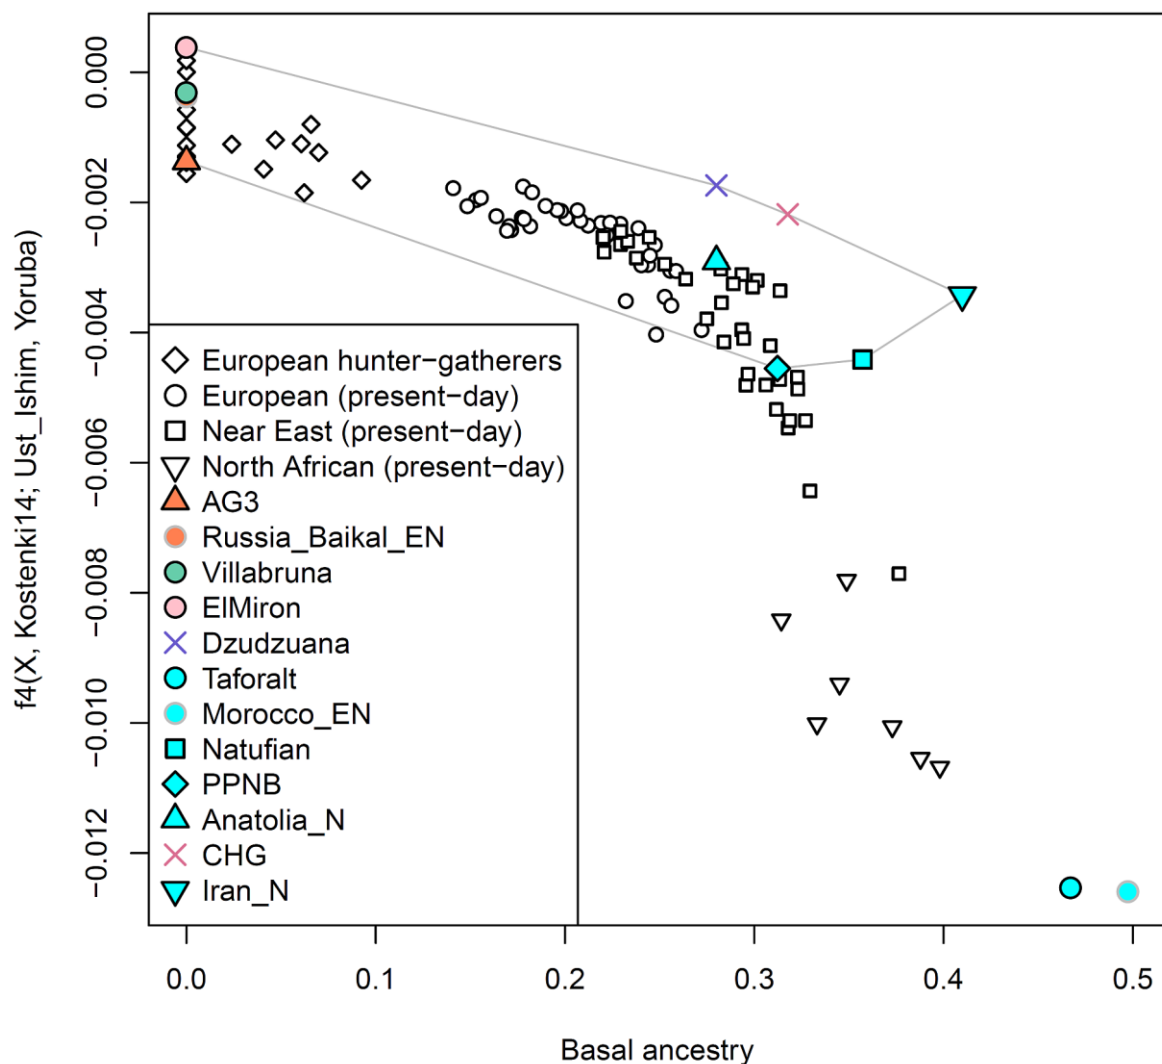

381

382

383 **Extended Data Figure 8: Deep ancestry of West Eurasians is associated with reduced**  
384 **Neanderthal ancestry.** Symbols used as in Fig. 1. Small grey-filled circles represent present-  
385 day West Eurasian individuals sequenced in the Simons Genome Diversity Project. The three  
386 left-most ancient samples and all the present-day populations are not used in the regression.  
387 Standard errors of the linear regression line are computed with a block jackknife  
388 (Supplementary Information section 5).

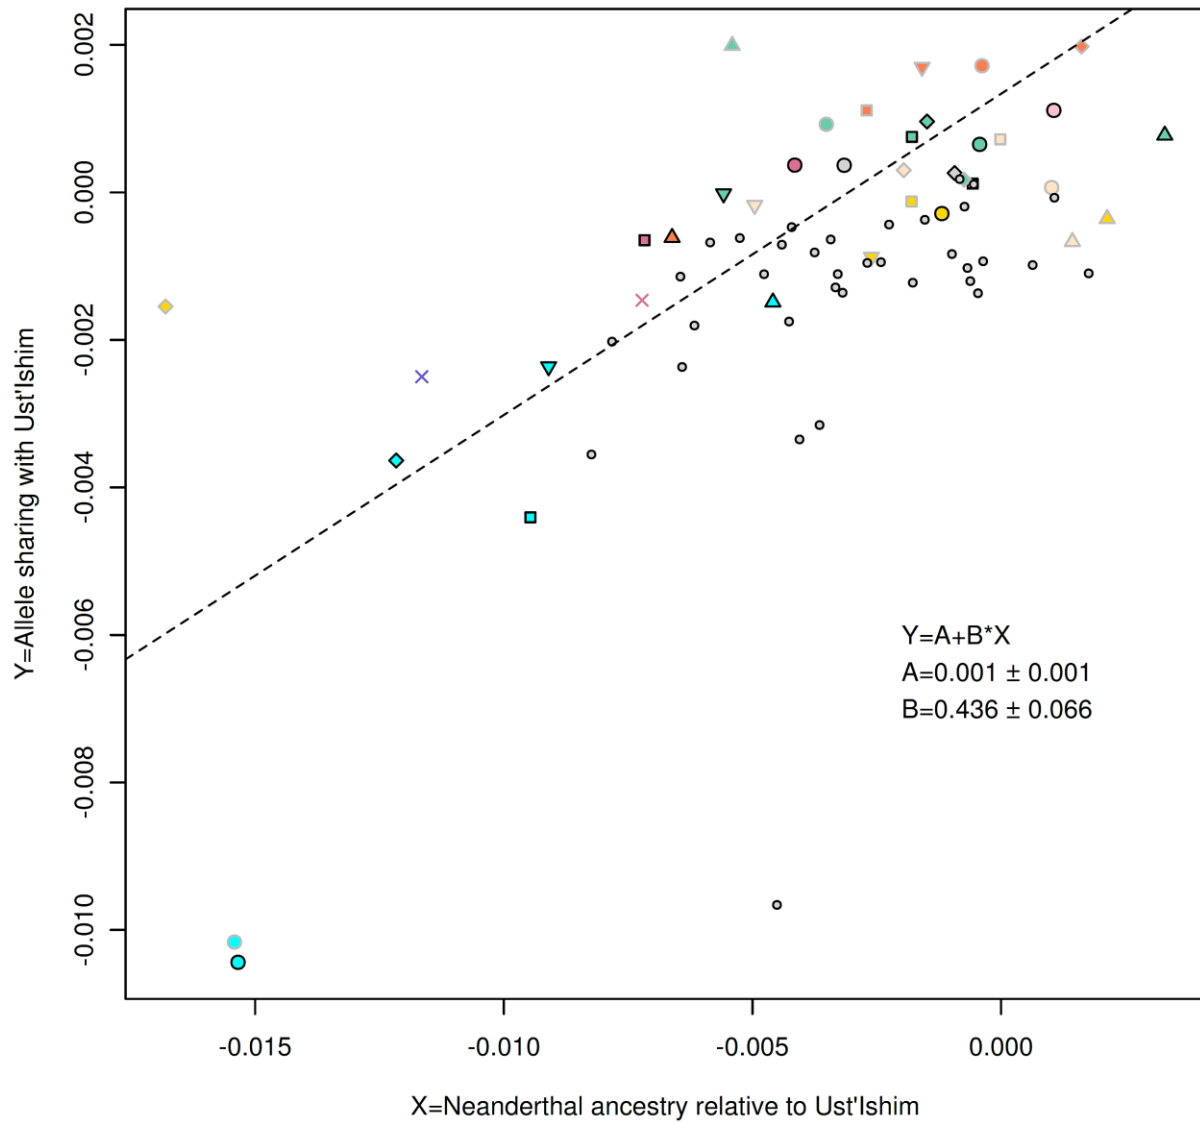

389

390

391 **Extended Data Table 1.  $F_{ST}$  of ancient West Eurasian populations.** The following groups  
 392 were used as  $F_{ST}$  estimation requires at least two individuals per population. ANE=MA1<sup>10</sup>  
 393 and AG3<sup>3</sup>. Aurignacian-era: Kostenki14 and Sunghir3<sup>4</sup>. CHG: Kotias and Satsurbliia<sup>5</sup>. EHG:  
 394 Karelia\_HG and Samara\_HG<sup>8,16</sup>. Gravettian-era: Vestonice16 and Ostuni1<sup>3</sup>. Mes\_WHG:  
 395 Loschbour<sup>9</sup>, KO1<sup>25</sup>, and LaBrana1<sup>26</sup>. UP\_WHG: Villabruna<sup>3</sup> and Bichon<sup>5</sup>. The value of the  
 396 statistic is shown below the diagonal and its standard error above it.

397

|             | Anatolia_N | ANE   | Aurignacian | CHG   | Dzudzuana | EHG   | Gravettian | Iran_N | Mes_WHG | Natufian | PPNB  | Taforalt | UP_WHG | Morocco_EN |
|-------------|------------|-------|-------------|-------|-----------|-------|------------|--------|---------|----------|-------|----------|--------|------------|
| Anatolia_N  | 0.003      | 0.002 | 0.002       | 0.002 | 0.005     | 0.002 | 0.002      | 0.001  | 0.002   | 0.002    | 0.001 | 0.002    | 0.003  | 0.003      |
| ANE         | 0.119      | 0.004 | 0.004       | 0.004 | 0.015     | 0.004 | 0.005      | 0.003  | 0.003   | 0.005    | 0.004 | 0.003    | 0.004  | 0.007      |
| Aurignacian | 0.078      | 0.096 | 0.003       | 0.009 | 0.003     | 0.004 | 0.003      | 0.003  | 0.003   | 0.003    | 0.003 | 0.003    | 0.004  | 0.004      |
| CHG         | 0.074      | 0.115 | 0.094       | 0.010 | 0.003     | 0.004 | 0.002      | 0.003  | 0.004   | 0.003    | 0.003 | 0.003    | 0.003  | 0.004      |
| Dzudzuana   | 0.039      | 0.100 | 0.060       | 0.068 | 0.009     | 0.012 | 0.007      | 0.007  | 0.013   | 0.008    | 0.006 | 0.006    | 0.009  | 0.021      |
| EHG         | 0.089      | 0.047 | 0.089       | 0.100 | 0.094     | 0.004 | 0.002      | 0.003  | 0.004   | 0.003    | 0.003 | 0.003    | 0.003  | 0.005      |
| Gravettian  | 0.089      | 0.116 | 0.028       | 0.117 | 0.051     | 0.100 | 0.003      | 0.003  | 0.005   | 0.003    | 0.003 | 0.003    | 0.004  | 0.006      |
| Iran_N      | 0.074      | 0.110 | 0.093       | 0.059 | 0.070     | 0.099 | 0.114      | 0.002  | 0.002   | 0.002    | 0.002 | 0.002    | 0.003  | 0.003      |
| Mes_WHG     | 0.098      | 0.132 | 0.087       | 0.126 | 0.084     | 0.081 | 0.092      | 0.132  | 0.003   | 0.002    | 0.002 | 0.002    | 0.003  | 0.003      |
| Natufian    | 0.076      | 0.164 | 0.121       | 0.131 | 0.106     | 0.142 | 0.131      | 0.126  | 0.148   | 0.003    | 0.003 | 0.003    | 0.004  | 0.007      |
| PPNB        | 0.022      | 0.122 | 0.087       | 0.085 | 0.052     | 0.100 | 0.090      | 0.080  | 0.109   | 0.043    | 0.002 | 0.003    | 0.004  | 0.004      |
| Taforalt    | 0.195      | 0.242 | 0.204       | 0.219 | 0.192     | 0.228 | 0.218      | 0.214  | 0.242   | 0.199    | 0.179 | 0.003    | 0.003  | 0.003      |
| UP_WHG      | 0.112      | 0.149 | 0.100       | 0.139 | 0.097     | 0.096 | 0.100      | 0.144  | 0.001   | 0.160    | 0.125 | 0.252    | 0.004  | 0.004      |
| Morocco_EN  | 0.206      | 0.254 | 0.219       | 0.230 | 0.195     | 0.236 | 0.234      | 0.225  | 0.252   | 0.218    | 0.190 | 0.101    | 0.267  | 0.004      |

398

## 399 **Methods**

### 400 **Ancient DNA**

401 In a dedicated ancient DNA clean room facility at University College Dublin, we prepared  
402 powder from the roots of teeth, and then sent these powders to Harvard Medical School  
403 where in another clean room we extracted DNA<sup>27,28</sup> and prepared double-stranded  
404 libraries<sup>29,30</sup> which we enriched for sequenced overlapping the mitochondrial genome and  
405 1.24 million SNPs in the nuclear genome<sup>1,16,31</sup> (Methods). We obtained usable data for two  
406 individuals after quality control and merging of data from 4 libraries for each of the two  
407 samples (treated with the enzyme UDG to reduce ancient DNA errors). The sequences from  
408 all libraries displayed characteristic damage in the terminal nucleotides consistent with partial  
409 UDG treatment.

### 410 **Contamination testing**

411 We assessed contamination by examining heterozygosity on mitochondrial DNA using  
412 contamMix<sup>19</sup> and schmutzi<sup>32</sup> (Supplementary Data Table 1).

### 413 **Datasets**

414 Our main analysis dataset included 1,233,013 SNPs, of which the 1,150,639 ones on the  
415 autosomes were analyzed. Present-day populations from the Simons Genome Diversity  
416 Panel<sup>33</sup> were included in this dataset. Analyses of Supplementary Information section 4 that  
417 included present-day populations<sup>6,9,13,18</sup> genotyped on the Affymetrix Human Origins array  
418 were performed on a dataset of 597,573 SNPs (593,124 on the autosomes).

### 419 **Estimation of $F_{ST}$**

420 We estimated  $F_{ST}$  in smartpca<sup>34</sup> using the default parameters and inbreed: YES<sup>35</sup> and fstonly:  
421 YES.

### 422 **$f$ -statistics**

423 All  $f$ -statistics were computed in ADMIXTOOLS<sup>18</sup> using the programs qpDstat (with  
424 parameter f4mode: YES) and qp3Pop and default parameters.

### 425 **Principal component analysis on outgroup $f_4$ -statistics**



426 We computed for  $n$  populations  $Test_1, Test_2, \dots, Test_n$  and  $n_o$  outgroups, a matrix of  $n \times d$   
427 dimensionality where  $d = n_o \binom{n_o - 1}{2}$  of outgroup  $f_4$ -statistics<sup>16</sup> of the form  $f_4(Test_i, O_1; O_2,$   
428  $O_3)$ . The outgroup set was: Vindija<sup>36</sup>, Altai<sup>23</sup>, Denisova<sup>37</sup>, Mbuti<sup>33</sup>, South\_Africa\_HG<sup>38</sup>,  
429 Mota<sup>39</sup>, Yoruba<sup>33</sup>, Han<sup>33</sup>, Onge<sup>33</sup>, Papuan<sup>33</sup>, Karitiana<sup>33</sup>, Ust\_Ishim<sup>19</sup>, Tianyuan<sup>20</sup>, MA1<sup>10</sup>,  
430 Kostenki14<sup>3</sup>, GoyetQ116-1<sup>3</sup>, Sunghir<sup>34</sup>, Vestonice16<sup>3</sup>, Ostuni1<sup>3</sup>, ElMiron<sup>3</sup>, Dzudzuana. PCA  
431 on the matrix was performed using the R package `ppca`<sup>40,41</sup> which allows for missing data,  
432 thus allowing us to also plot populations that are included in the outgroup set. `ppca` was run  
433 with parameters `nPcs = \lfloor \sqrt{n} \rfloor (the number of principal components used to fill in missing  
434 values), and seed = 123. Results are shown in Fig. 1c and Extended Data Fig. 4.`

### 435 **Admixture graph fitting**

436 We used ADMIXTUREGRAPH program `qpGraph` with parameters `outpop: NULL,`  
437 `blgsize: 0.05, forcezmode: YES, lsqmode: YES, diag: .0001, bigiter: 6,`  
438 `hires: YES, allsnps: YES, lambdascale: 1.` We used the hash value computed by  
439 `qpreroot` to avoid evaluating equivalent graphs. We fit graphs in an automated way described  
440 in Supplementary Information section 2.

### 441 **qpWave/qpAdm analyses**

442 We used `qpWave`<sup>16,35,42</sup> and `qpAdm`<sup>16</sup> to test for the number of streams of ancestry from a set  
443 of ‘right’ populations to a set of ‘left’ ones which includes the population whose history of  
444 admixture we study, and to also estimate mixture proportions (Supplementary Information  
445 section 3).

### 446 **Acknowledgments**

447 We thank M. Lipson, I. Mathieson, N. Nakatsuka, and I. Olalde for discussions or comments  
448 on a draft of this paper. We thank N. Adamski, M. Ferry, M. Michel, J. Oppenheimer, K.  
449 Stewardson for performing lab work.

### 450 **Author Contributions**

451 I.L. analyzed data with input from D.R. I.L., A.B.-C., R.P., D.R. wrote the manuscript with  
452 input from other co-authors. A.B.-C., G.B.-O., O.B.-Y., N.J., E.K., D.L., Z.M. T.M.  
453 undertook archaeological work in Dzudzuana cave; G.B.-O. studied the archaeozoology of  
454 the cave and E.K. its palynology. S.M. performed bioinformatics. N.P. aided in the admixture

455 graph analysis. O.C. and N.R. performed ancient DNA work. B.J.C. and D.J.K. performed  
456 <sup>14</sup>C dating. R.P. and D.R. co-ordinated the work.

#### 457 **Author Information**

458 Correspondence and requests for materials should be addressed to I.L.  
459 (lazaridis@genetics.med.harvard.edu) or R.P. (ron.pinhasi@univie.ac.at), or D.R.  
460 (reich@genetics.med.harvard.edu)

#### 461 **Data and Code availability**

462 The aligned sequences are available through the European Nucleotide Archive under  
463 accession number xxx. Genotype datasets used in analysis are available at  
464 <https://reich.hms.harvard.edu/datasets>. Code used to implement automated qpGraph fitting  
465 can be obtained from I.L. by request. All other data are available from the corresponding  
466 authors upon reasonable request.

#### 467 **References**

- 468
- 469 24. Bar-Yosef, O. *et al.* Dzudzuana: an Upper Palaeolithic cave site in the Caucasus foothills  
470 (Georgia). *Antiquity* **85**, 331-349, (2011).
  - 471 25. Gamba, C. *et al.* Genome flux and stasis in a five millennium transect of European prehistory.  
472 *Nat. Commun.* **5**, 5257 (2014).
  - 473 26. Olalde, I. *et al.* Derived immune and ancestral pigmentation alleles in a 7,000-year-old  
474 Mesolithic European. *Nature* **507**, 225-228, (2014).
  - 475 27. Dabney, J. *et al.* Complete mitochondrial genome sequence of a Middle Pleistocene cave bear  
476 reconstructed from ultrashort DNA fragments. *Proceedings of the National Academy of*  
477 *Sciences* **110**, 15758–15763, (2013).
  - 478 28. Korlevic, P. *et al.* Reducing microbial and human contamination in DNA extractions from  
479 ancient bones and teeth. *BioTechniques* **59**, 87-93, (2015).
  - 480 29. Meyer, M. & Kircher, M. Illumina sequencing library preparation for highly multiplexed  
481 target capture and sequencing. *Cold Spring Harb. Protoc.* **2010**, pdb prot5448, (2010).
  - 482 30. Rohland, N., Harney, E., Mallick, S., Nordenfelt, S. & Reich, D. Partial uracil–DNA–  
483 glycosylase treatment for screening of ancient DNA. *Philosophical Transactions of the Royal*  
484 *Society B: Biological Sciences* **370**, (2015).
  - 485 31. Fu, Q. *et al.* DNA analysis of an early modern human from Tianyuan Cave, China. *Proc.*  
486 *Natl. Acad. Sci. USA* **110**, 2223–2227, (2013).
  - 487 32. Renaud, G., Slon, V., Duggan, A. T. & Kelso, J. Schmutzi: estimation of contamination and  
488 endogenous mitochondrial consensus calling for ancient DNA. *Genome Biol.* **16**, 224, (2015).
  - 489 33. Mallick, S. *et al.* The Simons Genome Diversity Project: 300 genomes from 142 diverse  
490 populations. *Nature* **538**, 201-206, (2016).
  - 491 34. Patterson, N., Price, A. L. & Reich, D. Population structure and eigenanalysis. *PLoS Genet.* **2**,  
492 e190, (2006).
  - 493 35. Reich, D., Thangaraj, K., Patterson, N., Price, A. L. & Singh, L. Reconstructing Indian  
494 population history. *Nature* **461**, 489-494, (2009).
  - 495 36. Prüfer, K. *et al.* A high-coverage Neandertal genome from Vindija Cave in Croatia. *Science*,  
496 (2017).

- 497 37. Meyer, M. *et al.* A High-Coverage Genome Sequence from an Archaic Denisovan Individual.  
498 *Science* **338**, 222-226, (2012).
- 499 38. Skoglund, P. *et al.* Reconstructing Prehistoric African Population Structure. *Cell* **171**, 59-  
500 71.e21, (2017).
- 501 39. Llorente, M. G. *et al.* Ancient Ethiopian genome reveals extensive Eurasian admixture in  
502 Eastern Africa. *Science* **350**, 820-822, (2015).
- 503 40. Porta, J. M., Verbeek, J. J. & Kröse, B. J. A. Active Appearance-Based Robot Localization  
504 Using Stereo Vision. *Autonomous Robots* **18**, 59-80, (2005).
- 505 41. Roweis, S. T. in *Advances in neural information processing systems*. 626-632.
- 506 42. Moorjani, P. *et al.* Genetic evidence for recent population mixture in India. *Am. J. Hum.*  
507 *Genet.* **93**, 422-438, (2013).

508

509
